# Supplementary material
Source: PubMed Central journal article supplement (PMC5123943)
Supplement: NIHMS812734-supplement-supplement_1.pdf [file NIHMS812734-supplement-supplement_1.pdf]

## SUPPLEMENTARY MATERIAL

Table 1: Characteristics of the analysis sample

| Characteristic                         | Males (n=4323)<br>n (weighted %) | Females (n=5493)<br>n (weighted %) |
|----------------------------------------|----------------------------------|------------------------------------|
| <b>CONTROL VARIABLES</b>               |                                  |                                    |
| Race/Ethnicity <sup>a</sup> (WI)       |                                  |                                    |
| Hispanic                               | 692 (12.2)                       | 776 (10.7)                         |
| Black                                  | 721 (12.9)                       | 1206 (15.4)                        |
| Asian                                  | 318 (3.6)                        | 328 (3.3)                          |
| Native American                        | 94 (2.5)                         | 96 (1.9)                           |
| Other                                  | 38 (1.0)                         | 43 (1.0)                           |
| White                                  | 2460 (67.9)                      | 3044 (67.9)                        |
| Parental Education (WI)                |                                  |                                    |
| Less than high school                  | 475 (10.7)                       | 687 (11.1)                         |
| High school graduate                   | 1023 (25.6)                      | 1420 (28.4)                        |
| Some college                           | 1298 (30.3)                      | 1574 (28.9)                        |
| College graduate or<br>higher          | 1527 (33.4)                      | 1812 (31.6)                        |
| Age in years (mean (SD <sup>b</sup> )) |                                  |                                    |
| Wave I                                 | 15.5 (1.8)                       | 15.3 (1.8)                         |
| Wave III                               | 21.9 (1.9)                       | 21.7 (1.8)                         |
| Wave IV                                | 28.4 (1.9)                       | 28.1 (1.8)                         |
| Childhood maltreatment frequency       |                                  |                                    |
| Never                                  | 1498 (34.8)                      | 1732 (31.5)                        |
| Once                                   | 427 (9.7)                        | 557 (10.2)                         |
| Twice                                  | 443 (10.2)                       | 532 (9.4)                          |
| Three times                            | 739 (17.1)                       | 1035 (18.5)                        |
| Four or more times                     | 1216 (28.3)                      | 1637 (30.4)                        |

<sup>a</sup> All other race/ethnicities are non-Hispanic

<sup>b</sup> SD: Standard deviation



(none=referent)

|                                            |         |          |         |         |          |         |         |
|--------------------------------------------|---------|----------|---------|---------|----------|---------|---------|
| Once                                       | 0.13*   | 0.13*    | 0.13*   | 0.12*   | 0.12*    | 0.12    | 0.12    |
|                                            | (0.06)  | (0.06)   | (0.06)  | (0.06)  | (0.06)   | (0.06)  | (0.06)  |
| Twice                                      | 0.07    | 0.07     | 0.06    | 0.06    | 0.06     | 0.05    | 0.06    |
|                                            | (0.05)  | (0.05)   | (0.05)  | (0.05)  | (0.05)   | (0.05)  | (0.05)  |
| Three times                                | 0.17*** | 0.18***  | 0.17*** | 0.16*** | 0.17***  | 0.15*** | 0.15*** |
|                                            | (0.04)  | (0.04)   | (0.04)  | (0.04)  | (0.04)   | (0.04)  | (0.04)  |
| Four or more times                         | 0.11**  | 0.12**   | 0.10**  | 0.09*   | 0.10**   | 0.08*   | 0.08*   |
|                                            | (0.04)  | (0.04)   | (0.04)  | (0.04)  | (0.04)   | (0.04)  | (0.04)  |
| Drank alcoholic<br>beverage before WI      | 0.66*** | 0.66***  | 0.63*** | 0.65*** | 0.65***  | 0.65*** | 0.65*** |
|                                            | (0.04)  | (0.04)   | (0.04)  | (0.04)  | (0.04)   | (0.04)  | (0.04)  |
| Age x Sex                                  |         | 0.31***  |         |         | 0.25***  |         |         |
|                                            |         | (0.04)   |         |         | (0.04)   |         |         |
| Age^2 x Sex                                |         | -0.01*** |         |         | -0.01*** |         |         |
|                                            |         | (0.00)   |         |         | (0.00)   |         |         |
| Depression diagnosis<br>before WI          |         |          | -0.07   | -0.06   | -0.06    | -0.10   | -0.10   |
|                                            |         |          | (0.08)  | (0.08)  | (0.08)   | (0.08)  | (0.08)  |
| Depressive symptoms<br>(adol.)             |         |          | 0.03*** | 0.42*   | <-0.01   |         |         |
|                                            |         |          | (0.00)  | (0.19)  | (0.21)   |         |         |
| Age x Depressive<br>symptoms (adol.)       |         |          |         | -0.04   | 0.01     |         |         |
|                                            |         |          |         | (0.02)  | (0.03)   |         |         |
| Depressive symptoms<br>(adol.) x Sex       |         |          |         |         | 0.74     |         |         |
|                                            |         |          |         |         | (0.40)   |         |         |
| Age x Depressive<br>symptoms (adol.) x Sex |         |          |         |         | -0.10    |         |         |
|                                            |         |          |         |         | (0.05)   |         |         |
| Age^2 x Depressive<br>symptoms (adol.)     |         |          |         | <-0.01  | <-0.01   |         |         |
|                                            |         |          |         | (0.00)  | (0.00)   |         |         |

|                                                      |          |          |          |          |          |          |          |          |
|------------------------------------------------------|----------|----------|----------|----------|----------|----------|----------|----------|
| Age <sup>2</sup> x Depressive symptoms (adol.) x Sex |          |          |          |          |          | 0.003*   |          |          |
|                                                      |          |          |          |          |          | (0.00)   |          |          |
| Depressive symptoms (longitudinal)                   |          |          |          |          |          |          | 0.02***  | 0.02***  |
|                                                      |          |          |          |          |          |          | (0.00)   | (0.00)   |
| Depressive symptoms (longitudinal) x Sex             |          |          |          |          |          |          |          | -0.01    |
|                                                      |          |          |          |          |          |          |          | (0.01)   |
| Constant                                             | -4.17*** | -4.38*** | -2.97*** | -5.06*** | -5.63*** | -4.22*** | -4.54*** | -4.56*** |
|                                                      | (0.18)   | (0.18)   | (0.24)   | (0.18)   | (0.20)   | (0.24)   | (0.18)   | (0.18)   |
| Variance estimates (SE)                              |          |          |          |          |          |          |          |          |
| Respondent ID                                        | 0.56     | 0.36     | 0.37     | 0.37     | 0.36     | 0.37     | 0.36     | 0.36     |
|                                                      | (0.02)   | (0.02)   | (0.02)   | (0.02)   | (0.02)   | (0.02)   | (0.02)   | (0.02)   |
| Residual                                             | 1.51     | 1.51     | 1.49     | 1.50     | 1.50     | 1.48     | 1.50     | 1.50     |
|                                                      | (0.03)   | (0.03)   | (0.03)   | (0.03)   | (0.03)   | (0.03)   | (0.03)   | (0.03)   |

\*\*\* p<0.001, \*\* p<0.01, \* p<0.05

<sup>a</sup> Standard errors are beneath the coefficients in parentheses

<sup>b</sup> A random slope for age was tested, but did not meaningfully improve model fit and so was removed from all models

<sup>c</sup> Adolescence (adol.)



(none=referent)

|                                               |                   |                     |                   |                    |                     |                   |                   |
|-----------------------------------------------|-------------------|---------------------|-------------------|--------------------|---------------------|-------------------|-------------------|
| Once                                          | 0.06<br>(0.04)    | 0.06<br>(0.04)      | 0.06<br>(0.04)    | 0.05<br>(0.04)     | 0.06<br>(0.04)      | 0.04<br>(0.04)    | 0.04<br>(0.04)    |
| Twice                                         | 0.05<br>(0.04)    | 0.05<br>(0.04)      | 0.04<br>(0.04)    | 0.04<br>(0.04)     | 0.04<br>(0.04)      | 0.02<br>(0.04)    | 0.02<br>(0.04)    |
| Three times                                   | 0.19***<br>(0.05) | 0.19***<br>(0.05)   | 0.19***<br>(0.05) | 0.19***<br>(0.05)  | 0.19***<br>(0.05)   | 0.16**<br>(0.05)  | 0.16**<br>(0.05)  |
| Four or more times                            | 0.21***<br>(0.04) | 0.21***<br>(0.04)   | 0.20***<br>(0.04) | 0.20***<br>(0.04)  | 0.20***<br>(0.04)   | 0.16***<br>(0.04) | 0.16***<br>(0.04) |
| Marijuana use before<br>WI                    | 1.08***<br>(0.06) | 1.08***<br>(0.06)   | 1.07***<br>(0.06) | 1.07***<br>(0.06)  | 1.07***<br>(0.06)   | 1.06***<br>(0.06) | 1.06***<br>(0.06) |
| Age x Sex                                     |                   | 0.23***<br>(0.04)   |                   |                    | 0.21***<br>(0.04)   |                   |                   |
| Age^2 x Sex                                   |                   | -0.005***<br>(0.00) |                   |                    | -0.004***<br>(0.00) |                   |                   |
| Depression diagnosis<br>before WI             |                   |                     | 0.26*<br>(0.12)   | 0.26*<br>(0.12)    | 0.26*<br>(0.12)     | 0.19<br>(0.12)    | 0.19<br>(0.12)    |
| Depressive symptoms<br>(adol.)                |                   |                     | 0.01<br>(0.00)    | -0.45*<br>(0.18)   | -0.44*<br>(0.18)    |                   |                   |
| Age x Depressive<br>symptoms (adol.)          |                   |                     |                   | 0.06**<br>(0.02)   | 0.06**<br>(0.02)    |                   |                   |
| Depressive symptoms<br>(adol.) x Sex          |                   |                     |                   |                    | -0.38<br>(0.40)     |                   |                   |
| Age x Depressive<br>symptoms (adol.) x<br>Sex |                   |                     |                   |                    | 0.05<br>(0.05)      |                   |                   |
| Age^2 x Depressive<br>symptoms (adol.)        |                   |                     |                   | -0.002**<br>(0.00) | -0.001**<br>(0.00)  |                   |                   |

|                                                      |                    |                    |                    |                    |                    |                    |                    |                    |
|------------------------------------------------------|--------------------|--------------------|--------------------|--------------------|--------------------|--------------------|--------------------|--------------------|
| Age <sup>2</sup> x Depressive symptoms (adol.) x Sex |                    |                    |                    |                    |                    |                    |                    | <0.01<br>(0.00)    |
| Depressive symptoms (longitudinal)                   |                    |                    |                    |                    |                    |                    | 0.03***<br>(0.00)  | 0.03***<br>(0.00)  |
| Depressive symptoms (longitudinal) x Sex             |                    |                    |                    |                    |                    |                    |                    | <0.01<br>(0.01)    |
| Constant                                             | -2.67***<br>(0.17) | -2.97***<br>(0.18) | -1.92***<br>(0.17) | -3.13***<br>(0.18) | -3.33***<br>(0.20) | -2.19***<br>(0.20) | -3.16***<br>(0.18) | -3.16***<br>(0.19) |
| Variance estimates (SE)                              |                    |                    |                    |                    |                    |                    |                    |                    |
| Respondent ID                                        | 0.65<br>(0.03)     | 0.47<br>(0.02)     | 0.48<br>(0.02)     | 0.48<br>(0.02)     | 0.47<br>(0.02)     | 0.48<br>(0.02)     | 0.46<br>(0.02)     | 0.46<br>(0.02)     |
| Residual                                             | 1.51<br>(0.05)     | 1.51<br>(0.05)     | 1.49<br>(0.05)     | 1.51<br>(0.05)     | 1.51<br>(0.05)     | 1.49<br>(0.05)     | 1.50<br>(0.05)     | 1.50<br>(0.05)     |

\*\*\* p<0.001, \*\* p<0.01, \* p<0.05

a Standard errors are beneath the coefficients in parentheses

b A random slope for age was tested, but did not meaningfully improve model fit and so was removed from all models

c Adolescence (adol.)

Table 4: Linear mixed effects models of depressive symptoms with binge drinking frequency tested as a predictor (Stress Model) (n=9816)

|                                                  | M5: Binge drinking frequency (adol.) <sup>a,b</sup> | M6: Binge drinking frequency (adol.) x Age | M7: Binge drinking frequency (adol.) x Age x Sex | M8: Binge drinking frequency (longitudinal) | M9: Binge drinking frequency (longitudinal) x Sex |
|--------------------------------------------------|-----------------------------------------------------|--------------------------------------------|--------------------------------------------------|---------------------------------------------|---------------------------------------------------|
| Age                                              | -0.32***<br>(0.05)                                  | -0.32***<br>(0.05)                         | -0.34***<br>(0.06)                               | -0.44***<br>(0.05)                          | -0.44***<br>(0.05)                                |
| Age^2                                            | 0.01***<br>(0.00)                                   | 0.01***<br>(0.00)                          | 0.01***<br>(0.00)                                | 0.01***<br>(0.00)                           | 0.01***<br>(0.00)                                 |
| Sex (1=Male, 0=Female)                           | -0.96***<br>(0.08)                                  | -0.96***<br>(0.08)                         | -1.41<br>(0.98)                                  | -0.99***<br>(0.09)                          | -0.85***<br>(0.10)                                |
| Race/ethnicity (white=referent)                  |                                                     |                                            |                                                  |                                             |                                                   |
| Hispanic                                         | 0.51**<br>(0.16)                                    | 0.51**<br>(0.16)                           | 0.51**<br>(0.16)                                 | 0.51**<br>(0.16)                            | 0.51**<br>(0.16)                                  |
| Black                                            | 0.79***<br>(0.10)                                   | 0.79***<br>(0.10)                          | 0.79***<br>(0.10)                                | 0.85***<br>(0.10)                           | 0.86***<br>(0.10)                                 |
| Asian                                            | 0.82***<br>(0.15)                                   | 0.82***<br>(0.15)                          | 0.82***<br>(0.15)                                | 0.85***<br>(0.15)                           | 0.85***<br>(0.15)                                 |
| Native American                                  | 0.48<br>(0.25)                                      | 0.49<br>(0.25)                             | 0.49<br>(0.25)                                   | 0.50*<br>(0.25)                             | 0.49<br>(0.25)                                    |
| Other                                            | -0.09<br>(0.40)                                     | -0.09<br>(0.39)                            | -0.09<br>(0.40)                                  | -0.10<br>(0.42)                             | -0.09<br>(0.42)                                   |
| Parental education (WI) (college=referent)       |                                                     |                                            |                                                  |                                             |                                                   |
| < High school                                    | 1.40***<br>(0.16)                                   | 1.40***<br>(0.16)                          | 1.40***<br>(0.16)                                | 1.52***<br>(0.16)                           | 1.52***<br>(0.16)                                 |
| High school                                      | 0.65***<br>(0.11)                                   | 0.65***<br>(0.11)                          | 0.65***<br>(0.11)                                | 0.71***<br>(0.11)                           | 0.71***<br>(0.11)                                 |
| < College                                        | 0.39***<br>(0.11)                                   | 0.39***<br>(0.11)                          | 0.39***<br>(0.11)                                | 0.42***<br>(0.11)                           | 0.42***<br>(0.11)                                 |
| Childhood maltreatment frequency (none=referent) |                                                     |                                            |                                                  |                                             |                                                   |
| Once                                             | 0.60**<br>(0.19)                                    | 0.60**<br>(0.19)                           | 0.60**<br>(0.19)                                 | 0.59**<br>(0.19)                            | 0.58**<br>(0.19)                                  |
| Twice                                            | 0.80***<br>(0.13)                                   | 0.80***<br>(0.13)                          | 0.79***<br>(0.13)                                | 0.80***<br>(0.13)                           | 0.80***<br>(0.14)                                 |
| Three times                                      | 0.95***<br>(0.11)                                   | 0.96***<br>(0.11)                          | 0.95***<br>(0.11)                                | 0.95***<br>(0.11)                           | 0.95***<br>(0.11)                                 |
| Four or more times                               | 1.83***<br>(0.11)                                   | 1.83***<br>(0.11)                          | 1.82***<br>(0.11)                                | 1.82***<br>(0.11)                           | 1.82***<br>(0.11)                                 |
| Depression diagnosis before WI                   | 2.79***                                             | 2.78***                                    | 2.76***                                          | 2.83***                                     | 2.82***                                           |



|                                                           |                   |                   |                   |                   |                   |
|-----------------------------------------------------------|-------------------|-------------------|-------------------|-------------------|-------------------|
|                                                           | (0.37)            | (0.37)            | (0.37)            | (0.37)            | (0.37)            |
| Drank alcoholic beverage before WI                        | <-0.01<br>(0.10)  | <-0.01<br>(0.10)  | -0.01<br>(0.10)   | 0.13<br>(0.10)    | 0.13<br>(0.10)    |
| Binge drinking frequency (adol.)                          | 0.67***<br>(0.05) | -2.27<br>(4.26)   | -7.32<br>(6.22)   |                   |                   |
| Age x Binge drinking frequency (adol.)                    |                   | 0.38<br>(0.54)    | 1.08<br>(0.80)    |                   |                   |
| Binge drinking frequency (adol.) x Sex                    |                   |                   | 5.98<br>(8.96)    |                   |                   |
| Age x Sex                                                 |                   |                   | 0.05<br>(0.09)    |                   |                   |
| Age x Binge drinking frequency (adol.) x Sex              |                   |                   | -0.89<br>(1.13)   |                   |                   |
| Age <sup>2</sup> x Binge drinking frequency (adol.)       |                   | -0.01<br>(0.02)   | -0.03<br>(0.03)   |                   |                   |
| Age <sup>2</sup> x Sex                                    |                   |                   | <-0.01<br>(0.00)  |                   |                   |
| Age <sup>2</sup> x Binge drinking frequency (adol.) x Sex |                   |                   | 0.03<br>(0.04)    |                   |                   |
| Binge drinking frequency (longitudinal)                   |                   |                   |                   | 0.16***<br>(0.03) | 0.25***<br>(0.04) |
| Binge drinking frequency (longitudinal) x Sex             |                   |                   |                   |                   | -0.14**<br>(0.05) |
| Constant                                                  | 7.11***<br>(0.50) | 7.08***<br>(0.50) | 7.25***<br>(0.68) | 8.63***<br>(0.51) | 8.54***<br>(0.51) |
| <hr/>                                                     |                   |                   |                   |                   |                   |
| Variance estimates (SE)                                   |                   |                   |                   |                   |                   |
| Respondent ID                                             | 10.07<br>(2.25)   | 10.05<br>(2.26)   | 9.82<br>(2.25)    | 11.05<br>(2.30)   | 10.79<br>(2.29)   |
| Residual                                                  | 10.01<br>(0.27)   | 10.01<br>(0.27)   | 10.00<br>(0.27)   | 10.13<br>(0.27)   | 10.14<br>(0.27)   |
| Age                                                       | 0.01<br>(0.00)    | 0.01<br>(0.00)    | 0.01<br>(0.00)    | 0.01<br>(0.00)    | 0.01<br>(0.00)    |
| <hr/>                                                     |                   |                   |                   |                   |                   |

\*\*\* p<0.001, \*\* p<0.01, \* p<0.05

a Standard errors are beneath the coefficients in parentheses

b Adolescence (adol.)

Table 5: Linear mixed effects models of depressive symptoms with marijuana frequency tested as a predictor (Stress Model) (n=9816)

|                                                  | M5: Marijuana use frequency (adol.) <sup>a,b</sup> | M6: Marijuana use frequency (adol.) x Age | M7: Marijuana use frequency (adol.) x Age x Sex | M8: Marijuana use frequency (longitudinal) | M9: Marijuana use frequency (longitudinal) x Sex |
|--------------------------------------------------|----------------------------------------------------|-------------------------------------------|-------------------------------------------------|--------------------------------------------|--------------------------------------------------|
| Age                                              | -0.34***<br>(0.05)                                 | -0.33***<br>(0.05)                        | -0.36***<br>(0.06)                              | -0.43***<br>(0.05)                         | -0.43***<br>(0.05)                               |
| Age^2                                            | 0.01***<br>(0.00)                                  | 0.01***<br>(0.00)                         | 0.01***<br>(0.00)                               | 0.01***<br>(0.00)                          | 0.01***<br>(0.00)                                |
| Sex (1=Male, 0=Female)                           | -0.96***<br>(0.08)                                 | -0.95***<br>(0.08)                        | -1.68<br>(0.97)                                 | -1.00***<br>(0.09)                         | -0.89***<br>(0.09)                               |
| Race/ethnicity (white=referent)                  |                                                    |                                           |                                                 |                                            |                                                  |
| Hispanic                                         | 0.48**<br>(0.16)                                   | 0.48**<br>(0.16)                          | 0.48**<br>(0.16)                                | 0.48**<br>(0.17)                           | 0.48**<br>(0.16)                                 |
| Black                                            | 0.77***<br>(0.10)                                  | 0.77***<br>(0.10)                         | 0.78***<br>(0.10)                               | 0.77***<br>(0.10)                          | 0.78***<br>(0.10)                                |
| Asian                                            | 0.79***<br>(0.14)                                  | 0.80***<br>(0.14)                         | 0.80***<br>(0.14)                               | 0.83***<br>(0.15)                          | 0.83***<br>(0.14)                                |
| Native American                                  | 0.43<br>(0.25)                                     | 0.43<br>(0.25)                            | 0.43<br>(0.25)                                  | 0.45<br>(0.25)                             | 0.45<br>(0.25)                                   |
| Other                                            | -0.14<br>(0.39)                                    | -0.14<br>(0.39)                           | -0.14<br>(0.39)                                 | -0.11<br>(0.39)                            | -0.11<br>(0.40)                                  |
| Parental education (WI) (college=referent)       |                                                    |                                           |                                                 |                                            |                                                  |
| < High school                                    | 1.46***<br>(0.16)                                  | 1.46***<br>(0.16)                         | 1.46***<br>(0.16)                               | 1.49***<br>(0.16)                          | 1.50***<br>(0.16)                                |
| High school                                      | 0.70***<br>(0.11)                                  | 0.70***<br>(0.11)                         | 0.69***<br>(0.11)                               | 0.71***<br>(0.11)                          | 0.71***<br>(0.11)                                |
| < College                                        | 0.41***<br>(0.11)                                  | 0.41***<br>(0.11)                         | 0.41***<br>(0.11)                               | 0.41***<br>(0.11)                          | 0.41***<br>(0.11)                                |
| Childhood maltreatment frequency (none=referent) |                                                    |                                           |                                                 |                                            |                                                  |
| Once                                             | 0.60**<br>(0.19)                                   | 0.60**<br>(0.19)                          | 0.59**<br>(0.19)                                | 0.60**<br>(0.19)                           | 0.61**<br>(0.19)                                 |
| Twice                                            | 0.80***<br>(0.13)                                  | 0.80***<br>(0.13)                         | 0.79***<br>(0.13)                               | 0.80***<br>(0.13)                          | 0.80***<br>(0.13)                                |
| Three times                                      | 0.96***<br>(0.11)                                  | 0.96***<br>(0.11)                         | 0.96***<br>(0.11)                               | 0.94***<br>(0.11)                          | 0.94***<br>(0.11)                                |
| Four or more times                               | 1.80***<br>(0.11)                                  | 1.80***<br>(0.11)                         | 1.80***<br>(0.11)                               | 1.77***<br>(0.11)                          | 1.77***<br>(0.11)                                |

|                                                          |                   |                   |                   |                   |                    |
|----------------------------------------------------------|-------------------|-------------------|-------------------|-------------------|--------------------|
| Depression diagnosis before WI                           | 2.70***<br>(0.36) | 2.70***<br>(0.36) | 2.69***<br>(0.36) | 2.70***<br>(0.37) | 2.68***<br>(0.36)  |
| Marijuana use before WI                                  | 0.43***<br>(0.12) | 0.44***<br>(0.12) | 0.43***<br>(0.12) | 0.47***<br>(0.12) | 0.47***<br>(0.12)  |
| Marijuana use frequency (adol.)                          | 0.59***<br>(0.05) | -1.30<br>(5.05)   | -6.55<br>(6.61)   |                   |                    |
| Age x Marijuana use frequency (adol.)                    |                   | 0.29<br>(0.63)    | 1.03<br>(0.84)    |                   |                    |
| Age x Sex                                                |                   |                   | 0.07<br>(0.09)    |                   |                    |
| Marijuana use frequency (adol.) x Sex                    |                   |                   | 5.02<br>(9.69)    |                   |                    |
| Age x Marijuana use frequency (adol.) x Sex              |                   |                   | -0.80<br>(1.21)   |                   |                    |
| Age <sup>2</sup> x Marijuana use frequency (adol.)       |                   | -0.01<br>(0.02)   | -0.04<br>(0.03)   |                   |                    |
| Age <sup>2</sup> x Sex                                   |                   |                   | <-0.01<br>(0.00)  |                   |                    |
| Age <sup>2</sup> x Marijuana use frequency (adol.) x Sex |                   |                   | 0.03<br>(0.04)    |                   |                    |
| Marijuana use frequency (longitudinal)                   |                   |                   |                   | 0.19***<br>(0.02) | 0.30***<br>(0.04)  |
| Marijuana use frequency (longitudinal) x Sex             |                   |                   |                   |                   | -0.18***<br>(0.05) |
| Constant                                                 | 7.46***<br>(0.49) | 7.37***<br>(0.50) | 7.67***<br>(0.68) | 8.49***<br>(0.50) | 8.43***<br>(0.50)  |
| Variance estimates (SE)                                  |                   |                   |                   |                   |                    |
| Respondent ID                                            | 10.51<br>(2.24)   | 10.41<br>(2.25)   | 10.33<br>(2.24)   | 11.06<br>(2.25)   | 11.13<br>(2.25)    |
| Residual                                                 | 10.06<br>(0.27)   | 10.07<br>(0.27)   | 10.06<br>(0.27)   | 10.12<br>(0.27)   | 10.11<br>(0.27)    |
| Age                                                      | 0.01<br>(0.00)    | 0.01<br>(0.00)    | 0.01<br>(0.00)    | 0.01<br>(0.00)    | 0.01<br>(0.00)     |

\*\*\* p<0.001, \*\* p<0.01, \* p<0.05

a Standard errors are beneath the coefficients in parentheses

b Adolescence (adol.)
